# Supplementary material
Source: publisher site journal article supplement (https://www.dovepress.com/article/346145)
Supplement: Supplementary file 1 [file get_supplementary_file.php]

**Appendix**

**Supplementary Table S1:** GUI Buttons, tunable parameters and their functions

| **GUI Button** | **Tuneable Parameter** | **Operation** | **Description** |
| --- | --- | --- | --- |
| Select Directory | - | Choosing dataset directory | Selects the directory containing the dataset images |
| Manual | - | Manual segmentation | Optional operation used to manually segment the FAZ |
| Load | Crop X | Load image, complement and crop | Crops the area extended by the top and right image portions |
| Crop Y | Crops the area extended by bottom and left image portions |
| Threshold | Fudge | Prewitt's thresholding | Thresholding value for the cropped region |
| Close | Dilation | Image Closure | Length of linear structuring element that is used for dilation |
| Erosion | Radius of disk-shaped structuring element used for erosion |
| Segment | Filled | Segmentation | Visualizing the segment via region infilling |
| Outline | Visualizing the segment via region outline |
| Generate | - | Generate measurements | Perform measurements of 15 parametric dimensions |
| Export | - | Export measurements | Export the generated measurements to a .csv file |
